# Supplementary material for: Spontaneous Formation of Melanin from Dopamine in the Presence of Iron
Source: MDPI journal article supplement (doi:10.3390/antiox9121285), 2020-12-16
Supplement: s1 [file s1]

# Supplemental

**A**

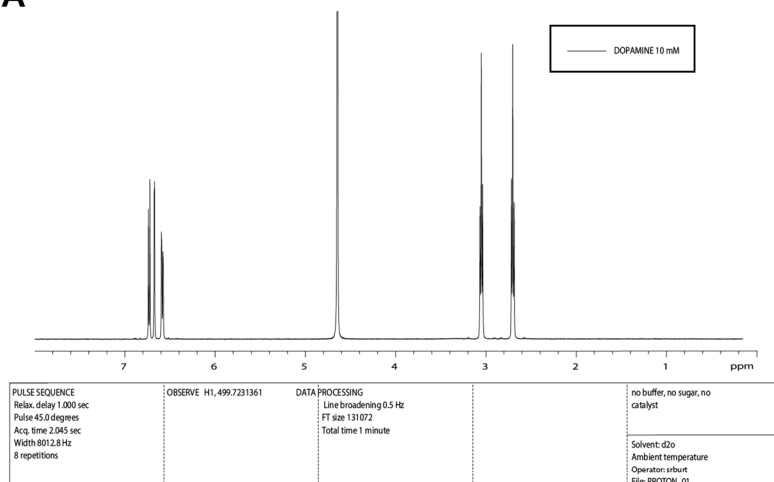

**B**

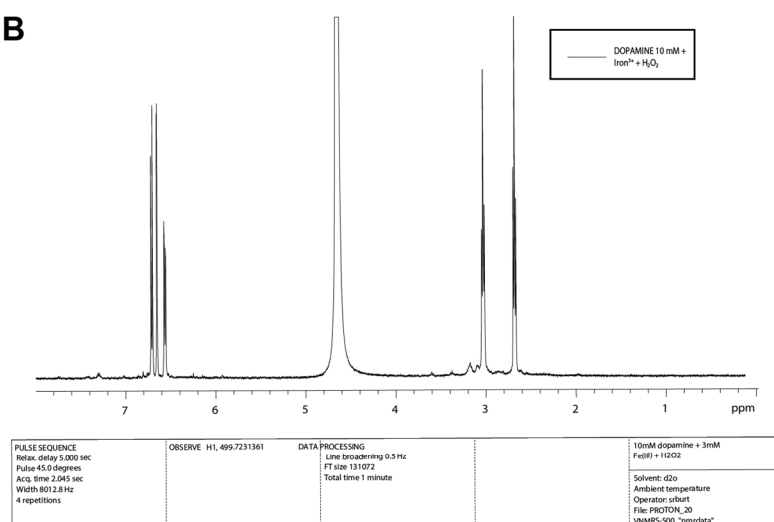

**C**

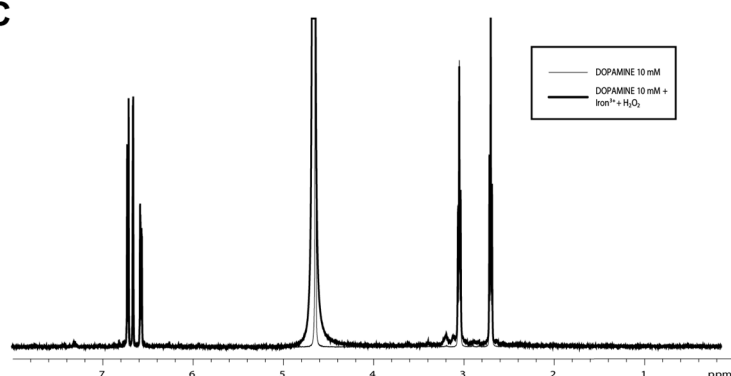

Figure S1: <sup>1</sup>H-NMR spectra showing that the dominant species at the **(A)** beginning of the reaction is dopamine, and **(B)** still dopamine at the end of the reaction. **(C)** Overlay of the spectra in **(A)** and **(B)** demonstrating that the peaks match perfectly.

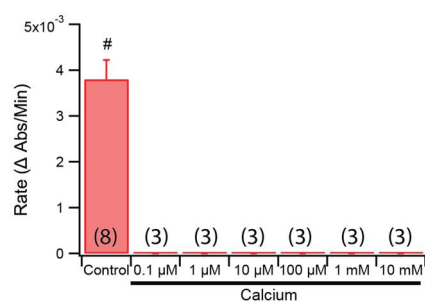

Figure S2: Calcium does not contribute to dopamine (DA) melanization. Control conditions are in the presence of trace elemental  $\text{Fe}^{3+}$  and indicate melanization with DA (30  $\mu\text{M}$ ). For the increasing calcium conditions,  $\text{Fe}^{3+}$  was chelated using transferrin prior to addition of increasing  $\text{Ca}^{2+}$  concentrations. No melanogenesis was observed for calcium experiments. Significance marker # denotes  $p < 0.0001$  significant differences for control vs all  $\text{Ca}^{2+}$  conditions as determined by a Tukey's HSD pairwise comparison. Error bars are mean + SEM. The n value for experiments is listed in parenthesis.

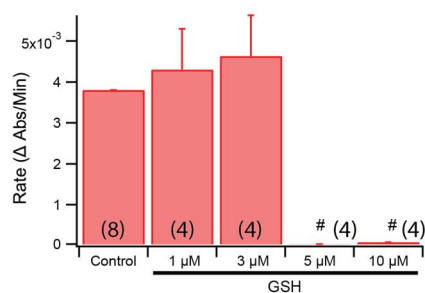

Figure S3: The antioxidant GSH reduces dopamine melanogenesis in a concentration dependent manner. Rate of melanin formation was comparable under control conditions, and with lower concentrations of GSH (1-3  $\mu\text{M}$ ). However, higher GSH concentrations similar to those used in Fig 4 (5-10  $\mu\text{M}$ ) blocked melanin formation. The binary nature of this effect indicates that the effect concentrations required are higher than 3  $\mu\text{M}$ . Significance marker # denotes  $p < 0.0001$  significant differences for control, 1 and 3  $\mu\text{M}$  vs 5 and 10  $\mu\text{M}$ . GSH conditions as determined by a Tukey's HSD pairwise comparison. Error bars are mean + SEM. The n value for experiments is listed in parenthesis.
